# Supplementary material
Source: publisher figshare collection journal article supplement (https://rs.figshare.com/ndownloader/files/30841388)
Supplement: Supplementary file 1 [file 30841388]

## Sheet: Sheet 1
SNP ID	Scaffold	Position arctic fox genome	A1	A2	N	Effect size±SE (Odds ratio)	χ2-statistic	p-value	p-value (corrected for λ)	Dog chromosome (BLAST results)	Position dog genome (BLAST results)
AX-177333963	11	21128881	C	T	678	0.91±0.039	537.135	7.91933e-119	6.84129e-63	chr5	63715077
AX-176912671	11	21118956	A	G	680	0.88±0.038	519.83	4.6083e-115	6.34399e-61	chr5	63705909
AX-177072191	11	21120562	T	C	680	0.88±0.038	519.645	5.05528e-115	6.65841e-61	chr5	63707513
AX-176934441	11	21114221	C	T	681	0.88±0.038	519.624	5.10994e-115	6.69593e-61	chr5	63701208
AX-176937990	11	21121051	T	C	681	0.88±0.038	519.624	5.10994e-115	6.69593e-61	chr5	63708008
AX-177192797	11	21247809	C	T	680	0.87±0.04	466.698	1.67599e-103	6.97996e-55	chr5	63837481
AX-177001825	11	20673056	G	T	680	0.84±0.04	436.149	7.45751e-97	2.08334e-51	chr5	63277957
AX-177351650	11	20365081	C	T	680	0.83±0.04	427.114	6.90289e-95	2.22156e-50	chr5	62992910
AX-177092146	11	20521768	C	T	681	0.82±0.04	419.332	3.41078e-93	1.70644e-49	chr5	63129393
AX-177166523	11	20207452	G	A	681	0.82±0.04	419.332	3.41078e-93	1.70644e-49	chr5	62834028
AX-177181351	2224	1172	C	T	681	0.82±0.04	419.332	3.41078e-93	1.70644e-49	chr27	45751423
AX-177207231	11	20884140	G	A	681	0.82±0.04	419.332	3.41078e-93	1.70644e-49	chr5	63490899
AX-177238003	11	20480985	C	A	681	0.82±0.04	419.332	3.41078e-93	1.70644e-49	chr5	63112192
AX-177188659	11	20451498	C	T	680	0.82±0.04	416.746	1.24655e-92	3.3599e-49	chr5	63082042
AX-176952400	11	21638363	G	A	680	0.77±0.038	403.525	9.40941e-90	1.0735e-47	chr5	64194118
AX-177154955	11	21677177	C	T	681	0.77±0.038	402.874	1.3038e-89	1.27308e-47	chr5	64232907
AX-177163324	11	21551840	G	A	681	0.77±0.038	402.874	1.3038e-89	1.27308e-47	chr5	64107555
AX-177304513	11	21508639	A	G	681	0.77±0.038	402.874	1.3038e-89	1.27308e-47	chr5	64064369
AX-177176641	11	20668592	A	G	680	0.78±0.039	401.928	2.09497e-89	1.63131e-47	chr5	63273452
AX-177276754	11	20800787	T	C	680	0.79±0.04	401.097	3.17829e-89	2.02848e-47	chr5	63406239
AX-177077082	11	21775467	T	C	681	0.77±0.039	394.422	9.02021e-88	1.16635e-46	chr5	64333432
AX-178035271	11	21795449	A	C	681	0.77±0.039	394.422	9.02021e-88	1.16635e-46	chr5	64355009
AX-177247786	2224	307	T	C	678	0.77±0.039	382.751	3.13378e-85	2.48478e-45	chr5	63529090
AX-176984075	11	22207829	C	A	681	0.76±0.039	381.663	5.40562e-85	3.30437e-45	chr5	64770641
AX-176967956	11	22205531	A	G	680	0.76±0.039	381.456	5.99764e-85	3.4889e-45	chr5	64768322
AX-177009164	11	21774122	C	T	674	0.7±0.037	352.591	1.15567e-78	6.74688e-42	chr5	64332085
AX-178018358	11	20590097	T	C	681	0.68±0.037	333.728	1.48196e-74	9.49678e-40	chr5	63193453
AX-177053638	11	20265281	T	C	681	0.6±0.034	311.807	8.8243e-70	2.98684e-37	chr5	62893118
AX-177330220	11	21637962	A	G	681	0.65±0.037	306.902	1.03285e-68	1.08172e-36	chr5	64193719
AX-176959145	11	21549156	T	C	679	0.65±0.037	306.471	1.28222e-68	1.2113e-36	chr5	64104834
AX-177153745	11	21692193	C	A	681	0.53±0.031	292.288	1.57756e-65	5.01106e-35	chr5	64249232
AX-177229708	11	20372497	C	T	681	0.53±0.031	292.131	1.70698e-65	5.22213e-35	chr5	63000510
AX-177260004	11	21220004	C	T	679	0.56±0.033	291.239	2.6702e-65	6.59963e-35	chr5	63801653
AX-177052645	11	20362642	G	T	680	0.53±0.031	290.436	3.99452e-65	8.14787e-35	chr5	62989931
AX-177072807	11	19837808	G	A	679	0.6±0.035	290.238	4.41365e-65	8.58456e-35	chr5	62464956
AX-177133231	11	21245683	C	T	681	0.55±0.033	282.033	2.70759e-63	7.39945e-34	chr5	63835329
AX-177276958	11	21222173	G	A	681	0.55±0.033	282.033	2.70759e-63	7.39945e-34	chr5	63803802
AX-177310235	11	19837230	A	G	680	0.59±0.035	276.618	4.09902e-62	3.06724e-33	chr5	62464378
AX-177051981	11	20952640	C	T	677	0.53±0.033	256.621	9.35649e-58	5.85958e-31	NA	NA
AX-176996014	11	20521850	C	T	681	0.53±0.033	255.013	2.09728e-57	8.94043e-31	chr5	63129475
AX-177026865	11	19544627	C	T	679	0.55±0.035	248.733	4.9055e-56	4.65604e-30	chr5	62179171
AX-177259734	11	19290226	A	G	680	0.55±0.035	248.645	5.12657e-56	4.76473e-30	chr5	61917666
AX-177015391	11	22017050	C	T	681	0.51±0.033	243.699	6.14099e-55	1.74828e-29	chr5	64581128
AX-176978051	11	18241438	C	T	681	0.51±0.033	229.3	8.47041e-52	7.7007e-28	chr5	60876324
AX-177035984	11	18911063	C	A	681	0.51±0.033	229.3	8.47041e-52	7.7007e-28	chr5	61538636
AX-177160311	11	18645775	G	A	681	0.51±0.033	229.3	8.47041e-52	7.7007e-28	chr5	61275694
AX-176980909	11	24717080	C	T	681	0.58±0.039	228.077	1.56537e-51	1.06218e-27	chr5	67263813
AX-177289717	11	24993044	T	C	679	0.58±0.039	226.973	2.72546e-51	1.42007e-27	chr5	67535339
AX-177166851	11	24988027	C	T	681	0.58±0.039	226.386	3.65977e-51	1.6571e-27	chr5	67530275
AX-177235131	11	25024256	G	A	681	0.58±0.039	226.386	3.65977e-51	1.6571e-27	chr5	67566996
AX-177301191	11	24993160	G	A	681	0.58±0.039	226.386	3.65977e-51	1.6571e-27	chr5	67535454
AX-176918010	11	20339526	T	C	681	0.42±0.028	222.935	2.07116e-50	4.1074e-27	chr5	62967233
AX-177154115	11	20362337	A	G	681	0.42±0.028	222.935	2.07116e-50	4.1074e-27	chr5	62989626
AX-177263714	11	16565596	C	T	681	0.5±0.033	221.681	3.8883e-50	5.71251e-27	chr5	59207494
AX-178022824	11	16546153	G	A	680	0.5±0.033	221.12	5.1534e-50	6.62059e-27	chr5	59187837
AX-177211999	11	20815939	A	G	681	0.44±0.03	220.497	7.0464e-50	7.79935e-27	chr5	63421491
AX-177212956	11	20808410	A	G	681	0.44±0.03	220.497	7.0464e-50	7.79935e-27	chr5	63413923
AX-176989313	11	24981459	T	C	679	0.57±0.038	219.598	1.10689e-49	9.88061e-27	chr5	67523302
AX-177026393	11	25311982	C	T	679	0.54±0.038	207.73	4.29652e-47	2.24342e-25	chr5	67853723
AX-177291662	11	18234185	G	A	681	0.46±0.032	204.547	2.12614e-46	5.18478e-25	chr5	60869063
AX-177047566	11	20295812	C	T	681	0.48±0.034	201.497	9.84246e-46	1.15717e-24	chr5	62923586
AX-177178887	11	20292538	C	T	681	0.48±0.034	201.497	9.84246e-46	1.15717e-24	chr5	62920299
AX-177346930	11	20779005	A	G	664	0.4±0.028	200.972	1.28146e-45	1.32875e-24	chr5	63384575
AX-177100473	11	22641902	C	A	681	0.49±0.035	197.194	8.55608e-45	3.59318e-24	chr5	65204500
AX-177015414	11	25698300	T	G	680	0.59±0.042	194.854	2.77297e-44	6.65372e-24	chr5	68217085
AX-177265530	11	19934251	T	G	681	0.41±0.03	194.238	3.77759e-44	7.8239e-24	chr5	62562402
AX-177052072	11	25734925	C	T	681	0.59±0.042	192.022	1.15096e-43	1.40271e-23	chr5	68252510
AX-177083692	11	25671887	A	C	681	0.59±0.042	192.022	1.15096e-43	1.40271e-23	chr5	68202576
AX-177136972	11	25119171	A	G	680	0.5±0.036	189.291	4.54039e-43	2.87954e-23	chr5	67660884
AX-177079677	11	24906742	G	T	681	0.49±0.036	188.063	8.4186e-43	3.97972e-23	chr5	67447441
AX-177112366	11	18023644	A	G	674	0.47±0.034	187.864	9.30268e-43	4.19355e-23	chr5	60659501
AX-177074404	11	17932013	C	T	680	0.47±0.034	187.024	1.41897e-42	5.23217e-23	chr5	60568019
AX-177114070	11	18330107	C	T	679	0.47±0.034	186.966	1.46095e-42	5.31274e-23	chr5	60963545
AX-177029046	11	18714207	C	T	681	0.44±0.032	186.454	1.88967e-42	6.07977e-23	chr5	61343852
AX-176959909	11	18309334	G	A	681	0.47±0.034	186.121	2.23423e-42	6.63761e-23	chr5	60942690
AX-176980546	11	18367866	A	G	681	0.47±0.034	186.121	2.23423e-42	6.63761e-23	chr5	60999083
AX-176983168	11	18398529	T	C	681	0.47±0.034	186.121	2.23423e-42	6.63761e-23	chr5	61029859
AX-177018732	11	18352122	G	A	681	0.47±0.034	186.121	2.23423e-42	6.63761e-23	chr5	60983352
AX-177096412	11	18109892	G	A	681	0.47±0.034	186.121	2.23423e-42	6.63761e-23	chr5	60745183
AX-177131554	11	18347315	G	A	681	0.47±0.034	186.121	2.23423e-42	6.63761e-23	chr5	60978565
AX-177159923	11	18373734	C	T	681	0.47±0.034	186.121	2.23423e-42	6.63761e-23	chr5	61004960
AX-177225910	11	18343582	G	T	681	0.47±0.034	186.121	2.23423e-42	6.63761e-23	chr5	60975058
AX-177229989	11	18238825	G	A	681	0.47±0.034	186.121	2.23423e-42	6.63761e-23	chr5	60873711
AX-177264455	11	18353460	C	T	681	0.47±0.034	186.121	2.23423e-42	6.63761e-23	chr5	60984690
AX-177265009	11	18538459	C	T	681	0.47±0.034	186.121	2.23423e-42	6.63761e-23	chr5	61168602
AX-177346988	11	18342401	T	C	681	0.47±0.034	186.121	2.23423e-42	6.63761e-23	chr5	60973884
AX-176966726	11	18032940	A	G	680	0.47±0.034	185.927	2.46328e-42	6.98596e-23	chr5	60668726
AX-177064068	11	25122112	C	A	681	0.49±0.036	185.586	2.92318e-42	7.64171e-23	chr5	67663631
AX-177156177	11	25119243	A	G	681	0.49±0.036	185.586	2.92318e-42	7.64171e-23	chr5	67660959
AX-177217752	11	18534295	G	A	680	0.45±0.033	182.28	1.54053e-41	1.82609e-22	chr5	61164450
AX-177108978	11	25534224	T	C	679	0.49±0.036	181.974	1.79628e-41	1.97918e-22	chr5	68078558
AX-177150344	11	18256908	G	A	681	0.46±0.034	181.597	2.1718e-41	2.18626e-22	chr5	60892024
AX-177068580	11	25535830	T	G	681	0.49±0.036	179.713	5.59955e-41	3.59182e-22	chr5	68080355
AX-178036509	11	25513306	G	A	681	0.49±0.036	179.713	5.59955e-41	3.59182e-22	chr5	68057805
AX-176931249	11	18774810	G	A	680	0.39±0.029	179.675	5.70567e-41	3.62735e-22	chr5	61402992
AX-178029988	11	16770281	G	A	669	0.44±0.033	178.01	1.31787e-40	5.62566e-22	chr5	59409047
AX-177095507	11	18811374	G	A	681	0.39±0.029	175.694	4.22389e-40	1.03598e-21	chr5	61439784
AX-177342255	11	20166349	C	T	667	0.33±0.025	175.465	4.73964e-40	1.10048e-21	chr5	62792182
AX-177074588	11	21180539	G	A	679	0.33±0.025	174.378	8.18612e-40	1.46557e-21	chr5	63767599
AX-177370380	11	18772082	C	T	668	0.38±0.029	173.472	1.29092e-39	1.86089e-21	chr5	61400262
AX-177026778	11	24446771	G	A	681	0.54±0.041	171.098	4.25901e-39	3.47956e-21	chr5	66992329
AX-177266575	11	18905003	T	G	679	0.41±0.031	170.671	5.28059e-39	3.89478e-21	chr5	61532531
AX-177050065	11	25422877	G	A	681	0.46±0.035	169.213	1.09888e-38	5.71957e-21	chr5	67968244
AX-176920524	11	19301517	T	C	681	0.37±0.028	168.579	1.51167e-38	6.76065e-21	chr5	61929414
AX-177078562	11	22065720	T	C	680	0.38±0.029	166.614	4.06136e-38	1.13516e-20	chr5	64631364
AX-176991647	11	27382954	T	C	681	0.55±0.043	163.777	1.69256e-37	2.39954e-20	chr5	69891390
AX-177259823	11	20187031	A	G	679	0.31±0.025	163.34	2.10868e-37	2.69274e-20	chr5	62812593
AX-177154324	11	20316356	C	A	681	0.38±0.03	161.672	4.87955e-37	4.18109e-20	chr5	62944234
AX-177330692	11	18867208	G	A	663	0.36±0.028	160.461	8.97235e-37	5.75479e-20	chr5	61494121
AX-177308347	11	20453456	C	T	680	0.3±0.023	160.339	9.53924e-37	5.94271e-20	chr5	63083942
AX-177341261	11	22723332	A	G	681	0.44±0.035	158.414	2.51245e-36	9.87609e-20	chr5	65285135
AX-177108363	11	20457361	T	C	681	0.29±0.023	157.882	3.28375e-36	1.13651e-19	chr5	63087778
AX-177199729	11	19938961	C	A	681	0.35±0.028	157.704	3.59266e-36	1.19139e-19	chr5	62567270
AX-176958862	11	20375735	T	C	680	0.35±0.028	155.543	1.06531e-35	2.10707e-19	chr5	63004681
AX-177030032	11	19925286	C	A	680	0.35±0.028	153.268	3.3467e-35	3.8413e-19	chr5	62553618
AX-176962704	11	20346267	C	A	680	0.35±0.028	153.254	3.37056e-35	3.85565e-19	chr5	62973989
AX-176912969	11	20375889	G	A	681	0.35±0.028	152.716	4.41927e-35	4.44446e-19	chr5	63004831
AX-176960008	11	18844674	T	C	672	0.35±0.028	151.435	8.42018e-35	6.23309e-19	NA	NA
AX-176939603	11	18853742	C	T	681	0.36±0.029	151.306	8.98575e-35	6.44935e-19	chr5	61480632
AX-177054487	11	18830782	G	A	681	0.36±0.029	151.306	8.98575e-35	6.44935e-19	chr5	61458662
AX-177064209	11	18822807	C	T	681	0.36±0.029	151.306	8.98575e-35	6.44935e-19	chr5	61450679
AX-176937556	11	18905789	T	G	680	0.35±0.029	149.635	2.0828e-34	1.00247e-18	chr5	61533317
AX-176920015	11	18080751	G	T	681	0.4±0.033	148.064	4.59462e-34	1.51831e-18	chr5	60715950
AX-177182276	11	20195691	G	A	680	0.28±0.024	140.039	2.60998e-32	1.26495e-17	chr5	62822153
AX-177263769	11	24419088	G	A	681	0.44±0.038	139.567	3.31107e-32	1.43321e-17	chr5	66963493
AX-178040442	11	19092166	G	A	680	0.33±0.028	139.084	4.22179e-32	1.62818e-17	chr5	61719733
AX-177085068	11	17562782	C	T	680	0.35±0.03	138.917	4.59223e-32	1.70167e-17	chr5	60206300
AX-177231474	11	25037420	A	G	681	0.39±0.033	138.622	5.32663e-32	1.83949e-17	chr5	67580315
AX-177127507	11	17615469	G	A	681	0.32±0.027	137.066	1.16671e-31	2.77616e-17	chr5	60259286
AX-177081268	11	17744402	C	T	681	0.35±0.03	135.471	2.6049e-31	4.23224e-17	chr5	60381247
AX-177265459	11	17784778	C	T	681	0.35±0.03	135.471	2.6049e-31	4.23224e-17	chr5	60422033
AX-177156680	11	18515019	T	C	681	0.37±0.032	134.238	4.84575e-31	5.8627e-17	chr5	61145584
AX-176989583	11	17771403	T	C	681	0.35±0.03	133.944	5.61851e-31	6.33631e-17	chr5	60408609
AX-177224287	11	24966212	C	T	681	0.38±0.033	130.269	3.57871e-30	1.67515e-16	chr5	67507056
AX-177109714	11	20425339	C	A	681	-0.28±0.025	127.179	1.69771e-29	3.79435e-16	chr5	63055701
AX-178047681	11	16471246	C	T	680	0.33±0.03	126.839	2.01508e-29	4.15172e-16	chr5	59112860
AX-177090133	11	16803239	G	A	681	0.36±0.032	126.712	2.14817e-29	4.29354e-16	chr17	48479778
AX-177337832	11	26066003	A	G	681	0.34±0.03	124.599	6.22869e-29	7.51021e-16	chr5	68580032
AX-176945802	11	26546540	A	G	681	0.32±0.029	124.571	6.31819e-29	7.5667e-16	chr5	69061645
AX-177145551	11	26015483	G	A	681	0.47±0.043	122.422	1.86571e-28	1.33639e-15	chr5	68529936
AX-178026578	11	21803553	T	G	681	0.27±0.024	122.365	1.92037e-28	1.35682e-15	chr5	64363110
AX-177307382	11	25307382	G	A	681	0.36±0.032	121.295	3.29292e-28	1.80118e-15	chr5	67849133
AX-177242091	11	19659990	T	C	680	0.25±0.023	120.185	5.76177e-28	2.41664e-15	chr5	62286350
AX-177370995	11	26490674	A	G	679	0.4±0.036	119.66	7.51028e-28	2.77771e-15	chr5	69006182
AX-176933873	11	18158029	A	G	679	0.3±0.028	119.652	7.53924e-28	2.78333e-15	chr5	60793119
AX-177250434	11	26790765	C	T	680	0.49±0.045	119.633	7.61351e-28	2.7977e-15	chr5	69303358
AX-177271957	11	26509139	C	A	681	0.39±0.036	119.459	8.30788e-28	2.92899e-15	chr5	69024482
AX-177069172	11	26547614	T	C	680	0.49±0.045	118.521	1.33357e-27	3.75586e-15	chr5	69062708
AX-177130497	11	19794569	A	G	680	0.26±0.024	118.387	1.42667e-27	3.89142e-15	chr5	62421631
AX-177188627	11	26658558	A	G	680	0.49±0.045	118.303	1.48843e-27	3.97905e-15	chr5	69171910
AX-177101064	11	20337167	A	G	681	0.25±0.023	118.238	1.53772e-27	4.04775e-15	chr5	62964927
AX-176960247	11	26874637	C	T	681	0.49±0.045	117.788	1.92967e-27	4.56067e-15	chr5	69386718
AX-176969666	11	26765317	A	G	681	0.49±0.045	117.788	1.92967e-27	4.56067e-15	chr5	69278529
AX-176974194	11	26643747	G	A	681	0.49±0.045	117.788	1.92967e-27	4.56067e-15	chr5	69157071
AX-176995697	11	26922327	A	G	681	0.49±0.045	117.788	1.92967e-27	4.56067e-15	chr5	69434379
AX-177013275	11	27393386	A	G	681	0.49±0.045	117.788	1.92967e-27	4.56067e-15	chr5	69902293
AX-177069255	11	26563836	G	T	681	0.49±0.045	117.788	1.92967e-27	4.56067e-15	chr5	69077153
AX-177111666	11	26874338	C	T	681	0.49±0.045	117.788	1.92967e-27	4.56067e-15	chr5	69386420
AX-177185447	11	27396982	C	T	681	0.49±0.045	117.788	1.92967e-27	4.56067e-15	chr5	69905693
AX-177209678	11	26654785	A	G	681	0.49±0.045	117.788	1.92967e-27	4.56067e-15	chr5	69168132
AX-177241747	11	26870062	C	T	681	0.49±0.045	117.788	1.92967e-27	4.56067e-15	chr5	69382451
AX-177361873	11	26579053	G	A	681	0.49±0.045	117.788	1.92967e-27	4.56067e-15	chr5	69092305
AX-177348512	11	26862946	A	G	681	0.4±0.037	117.211	2.58098e-27	5.31372e-15	chr5	69374919
AX-177218600	11	26503891	G	A	679	0.47±0.044	114.797	8.71834e-27	1.00744e-14	chr5	69019234
AX-176919847	11	17847848	C	T	680	0.29±0.027	114.658	9.35082e-27	1.04521e-14	chr5	60484231
AX-177345551	11	18918129	T	C	681	0.3±0.028	114.318	1.10998e-26	1.14378e-14	chr5	61545379
AX-177098881	11	18837798	A	G	680	0.3±0.028	114.018	1.2912e-26	1.2384e-14	chr5	61465761
AX-177256872	11	21073276	C	T	681	-0.3±0.028	113.08	2.07245e-26	1.58808e-14	chr5	63660379
AX-177111092	11	18692641	A	G	679	0.29±0.027	112.97	2.19069e-26	1.63507e-14	chr5	61322260
AX-176900577	11	25409729	C	T	681	0.34±0.032	112.13	3.34556e-26	2.04266e-14	chr5	67955013
AX-176970464	11	30036444	G	A	678	0.47±0.044	111.999	3.57571e-26	2.11536e-14	chr5	72520436
AX-177014704	11	30287448	T	C	680	0.47±0.044	111.97	3.62726e-26	2.13134e-14	chr5	72772722
AX-176888424	11	26574206	T	C	679	0.47±0.044	111.852	3.85027e-26	2.19925e-14	chr5	69087492
AX-177275435	11	26956241	T	C	680	0.46±0.044	111.698	4.16099e-26	2.29082e-14	chr5	69468128
AX-176975652	11	30212417	C	T	681	0.47±0.044	111.43	4.76329e-26	2.45954e-14	chr5	72697757
AX-177047555	11	30346653	A	C	681	0.47±0.044	111.43	4.76329e-26	2.45954e-14	chr5	72831887
AX-177209048	11	30020819	C	T	681	0.47±0.044	111.43	4.76329e-26	2.45954e-14	chr5	72504833
AX-177329497	11	30015201	C	A	681	0.47±0.044	111.43	4.76329e-26	2.45954e-14	chr5	72499157
AX-178023910	11	10671242	G	A	681	0.47±0.044	111.291	5.10797e-26	2.55155e-14	chr5	53411338
AX-177090442	11	17853753	A	G	681	0.28±0.027	111.171	5.42807e-26	2.6344e-14	chr5	60490389
AX-176951658	11	26845000	C	T	681	0.46±0.044	111.12	5.56818e-26	2.66993e-14	chr5	69356949
AX-176970875	11	26851509	C	T	681	0.46±0.044	111.12	5.56818e-26	2.66993e-14	chr5	69363417
AX-177295372	11	27174682	G	A	681	0.46±0.044	111.12	5.56818e-26	2.66993e-14	chr5	69685525
AX-177036539	11	25216124	T	C	681	0.33±0.031	110.031	9.64659e-26	3.56423e-14	chr5	67757661
AX-178025162	11	19136147	A	G	678	0.27±0.026	109.499	1.26197e-25	4.10493e-14	chr5	61763380
AX-178049277	11	19777308	A	C	681	-0.27±0.026	108.861	1.7404e-25	4.86075e-14	chr5	62404366
AX-176960359	11	19806529	T	C	680	0.24±0.023	108.792	1.80272e-25	4.9515e-14	chr5	62433616
AX-176933693	11	30690101	G	A	680	0.46±0.044	108.19	2.44224e-25	5.80854e-14	chr5	73174314
AX-177208418	11	30739619	A	G	681	0.46±0.044	107.693	3.13887e-25	6.62784e-14	chr5	73223718
AX-177344111	11	30734004	A	C	681	0.46±0.044	107.693	3.13887e-25	6.62784e-14	NA	NA
AX-178047687	11	27097632	A	G	680	0.45±0.043	107.398	3.64224e-25	7.167e-14	chr5	69607285
AX-176904682	11	19760281	G	A	680	-0.27±0.026	106.926	4.62164e-25	8.12313e-14	chr5	62387854
AX-177042543	11	17050417	G	A	681	0.28±0.027	106.568	5.53509e-25	8.93125e-14	chr5	59683843
AX-177015871	11	16364795	T	C	681	0.29±0.028	106.44	5.90481e-25	9.24015e-14	chr5	59007699
AX-177161464	11	19733524	G	T	680	0.24±0.023	106.4	6.02603e-25	9.33942e-14	chr5	62361187
AX-177271480	11	10321771	A	G	681	0.45±0.044	106.243	6.52135e-25	9.73555e-14	chr5	53063659
AX-176939369	11	17857738	G	T	678	0.27±0.026	104.422	1.63485e-24	1.57859e-13	chr5	60494192
AX-178041817	11	16800752	T	C	681	0.29±0.029	104.108	1.91555e-24	1.71579e-13	chr5	59439440
AX-177089072	11	19802708	A	G	679	0.24±0.024	104.024	1.99869e-24	1.75456e-13	chr5	62429811
AX-176985074	11	26770601	G	A	669	0.32±0.032	103.404	2.73322e-24	2.06853e-13	chr5	69283738
AX-177282297	11	32830277	A	C	681	0.37±0.036	103.384	2.76141e-24	2.07973e-13	chr5	75269962
AX-176925008	11	25424037	G	T	681	0.31±0.031	103.382	2.76419e-24	2.08083e-13	chr5	67969408
AX-177232400	11	17991570	T	C	677	0.29±0.028	103.328	2.83962e-24	2.1105e-13	chr5	60627543
AX-178020671	11	21723866	A	G	677	-0.26±0.025	102.656	3.98735e-24	2.52307e-13	chr5	64281771
AX-177084322	11	26516241	A	C	679	0.32±0.032	102.293	4.78766e-24	2.7779e-13	chr5	69031303
AX-177278121	11	26049610	G	T	679	0.28±0.028	101.994	5.56844e-24	3.00766e-13	chr5	68563820
AX-176885168	11	17976247	C	A	679	0.28±0.028	101.835	6.03406e-24	3.13744e-13	chr5	60612196
AX-177221001	11	26049719	C	T	680	0.28±0.027	101.828	6.0567e-24	3.14363e-13	chr5	68563921
AX-176921687	11	24204200	T	C	680	0.36±0.036	101.535	7.0214e-24	3.39779e-13	chr5	66747144
AX-177260598	11	21043614	T	C	679	0.24±0.024	99.7909	1.6937e-23	5.39984e-13	chr5	63630468
AX-177004244	11	21039997	G	A	679	0.24±0.024	99.7842	1.69937e-23	5.40933e-13	chr5	63626446
AX-177119484	11	21029693	C	A	680	0.24±0.024	99.133	2.36107e-23	6.43113e-13	chr5	63616335
AX-177116372	11	20917364	A	G	680	-0.27±0.027	99.0408	2.47357e-23	6.59059e-13	chr27	45755900
AX-177313131	11	21042982	C	T	681	0.24±0.024	98.7893	2.80849e-23	7.04598e-13	chr5	63629631
AX-177204070	11	26180430	C	T	680	0.42±0.043	98.3416	3.52093e-23	7.93605e-13	chr5	68695073
AX-176924113	11	22641201	A	G	680	0.26±0.026	97.7835	4.66725e-23	9.20477e-13	chr5	65203807
AX-177033502	11	21220076	C	T	681	-0.28±0.028	97.6403	5.01725e-23	9.56178e-13	chr5	63801721
AX-177079816	11	21227922	T	C	681	-0.28±0.028	97.6403	5.01725e-23	9.56178e-13	chr5	63815325
AX-177196383	11	21213206	A	G	681	-0.28±0.028	97.6403	5.01725e-23	9.56178e-13	chr5	63795089
AX-177305512	11	21218638	A	G	680	-0.28±0.028	97.3351	5.8533e-23	1.03696e-12	chr5	63800296
AX-177242142	11	20571756	C	A	678	0.25±0.025	97.0699	6.69216e-23	1.11268e-12	chr5	63176474
AX-176958968	11	20574459	G	A	681	0.25±0.025	96.9992	6.93543e-23	1.13379e-12	chr5	63179044
AX-177162087	11	30527664	G	T	681	0.42±0.042	96.5552	8.67899e-23	1.27581e-12	chr5	73012570
AX-177181410	11	21205843	G	A	680	-0.28±0.028	96.5204	8.83281e-23	1.28766e-12	chr5	63787930
AX-177263183	11	21030795	A	G	680	0.23±0.024	95.9776	1.16192e-22	1.48754e-12	chr5	63617465
AX-177047813	11	21123504	G	A	680	-0.27±0.028	95.4049	1.55173e-22	1.73219e-12	chr5	63710260
AX-177276433	11	20322598	T	C	680	0.22±0.023	95.0461	1.86007e-22	1.90557e-12	chr5	62950515
AX-177311239	11	21220142	T	G	681	-0.27±0.028	94.3673	2.62086e-22	2.28248e-12	chr5	63801787
AX-177064760	11	17588776	C	T	680	0.27±0.028	94.0002	3.15487e-22	2.51651e-12	chr5	60232363
AX-176918354	11	21049991	G	A	674	0.23±0.024	93.5329	3.99511e-22	2.84957e-12	chr5	63637385
AX-177144350	11	25033193	T	C	680	0.29±0.03	92.881	5.55365e-22	3.3891e-12	chr5	67576120
AX-177015390	11	25033060	A	C	681	0.29±0.03	92.5872	6.44231e-22	3.66455e-12	chr5	67575987
AX-177232997	11	20920887	C	A	669	-0.25±0.026	92.4645	6.85442e-22	3.78615e-12	chr5	63527181
AX-176936555	11	26670145	G	A	671	0.39±0.041	92.4195	7.01215e-22	3.83177e-12	chr5	69183470
AX-176920562	11	32286251	C	T	681	0.37±0.038	92.342	7.2919e-22	3.91151e-12	chr5	74709483
AX-177341557	11	32300619	C	T	681	0.37±0.038	92.342	7.2919e-22	3.91151e-12	chr5	74722961
AX-178046196	11	24155484	T	C	680	0.33±0.035	90.5686	1.78672e-21	6.27004e-12	chr5	66699033
AX-177096875	11	21129253	G	A	678	-0.27±0.028	90.2089	2.14297e-21	6.89997e-12	chr5	63715668
AX-176939237	11	24450398	C	A	681	0.33±0.035	90.0284	2.34767e-21	7.23954e-12	chr5	66996036
AX-177234292	11	32295527	C	T	680	0.36±0.038	89.3497	3.30845e-21	8.67297e-12	chr5	74718288
AX-177040845	11	32285619	G	A	678	0.35±0.037	89.1856	3.59454e-21	9.06016e-12	chr5	74708851
AX-177285100	11	32212062	C	T	672	0.38±0.04	88.5433	4.97332e-21	1.07497e-11	chr5	74635926
AX-177152412	11	30737526	G	T	681	0.39±0.041	88.4365	5.24925e-21	1.10597e-11	chr5	73221606
AX-177197491	11	24448302	A	G	672	0.32±0.034	87.6229	7.92026e-21	1.37352e-11	chr5	66993863
AX-177338872	11	32864328	G	T	681	0.42±0.045	86.7604	1.225e-20	1.7282e-11	chr5	75302884
AX-177315749	11	30113354	G	A	681	0.3±0.032	86.3052	1.54201e-20	1.95095e-11	chr5	72597089
AX-177247555	11	21829058	C	T	681	-0.25±0.027	85.9608	1.83535e-20	2.1384e-11	chr5	64393344
AX-176901314	11	9879510	G	A	681	0.32±0.035	85.4872	2.33201e-20	2.42596e-11	chr5	52624215
AX-176897491	11	21542871	C	T	681	-0.26±0.028	85.0021	2.98049e-20	2.76072e-11	chr5	64098519
AX-177044388	11	21610584	C	T	681	-0.26±0.028	85.0021	2.98049e-20	2.76072e-11	chr5	64166294
AX-177213325	11	21231599	C	A	681	-0.26±0.028	85.0021	2.98049e-20	2.76072e-11	chr5	63818479
AX-177308765	11	21629872	C	T	681	-0.26±0.028	85.0021	2.98049e-20	2.76072e-11	chr5	64185412
AX-177282876	11	9872872	T	C	680	0.32±0.035	84.7712	3.34961e-20	2.93587e-11	chr5	52617594
AX-177090473	11	24688716	C	T	680	0.3±0.033	84.4688	3.90328e-20	3.18229e-11	chr5	67235707
AX-177108150	11	21619199	A	G	679	-0.26±0.028	83.5376	6.25141e-20	4.07868e-11	chr5	64174569
AX-177303286	11	22145276	A	G	681	0.22±0.024	82.7702	9.21681e-20	5.00457e-11	chr5	64712601
AX-177099456	11	25351824	G	T	681	0.26±0.028	81.3598	1.88147e-19	7.28956e-11	chr5	67896621
AX-177045881	11	24398805	A	G	681	0.26±0.029	80.8357	2.45287e-19	8.3832e-11	chr5	66943470
AX-177302279	11	26401676	A	G	681	0.3±0.034	79.5132	4.79004e-19	1.19298e-10	chr5	68917743
AX-177257886	11	22364133	C	T	679	0.24±0.027	79.5119	4.79334e-19	1.19341e-10	chr5	64927414
AX-176962903	11	17483382	C	T	681	0.2±0.023	79.3423	5.22281e-19	1.24864e-10	chr5	60125008
AX-177324899	11	26479435	G	A	681	0.29±0.033	79.0672	6.00336e-19	1.34378e-10	chr5	68994729
AX-177099714	11	29903145	C	T	681	0.35±0.04	78.9981	6.21687e-19	1.36877e-10	chr5	72387466
AX-177211689	11	29915024	C	T	681	0.35±0.04	78.9981	6.21687e-19	1.36877e-10	chr5	72399365
AX-177308229	11	25000288	A	G	680	0.26±0.029	78.6341	7.47493e-19	1.50844e-10	chr5	67542453
AX-177285435	11	24450921	A	C	681	0.29±0.033	78.3998	8.41618e-19	1.60578e-10	chr5	66996566
AX-177159528	11	16274997	G	A	681	0.23±0.027	78.359	8.59161e-19	1.62334e-10	chr5	58918617
AX-177246627	11	20026801	G	A	679	-0.23±0.026	77.7569	1.16536e-18	1.9064e-10	chr5	62653540
AX-177075746	11	16361241	G	A	679	0.24±0.027	77.6813	1.21083e-18	1.94527e-10	chr5	59004363
AX-177027270	11	20709800	C	T	680	-0.24±0.028	77.5633	1.28535e-18	2.00751e-10	chr5	63314777
AX-177120779	11	26101992	C	T	680	0.22±0.024	77.3435	1.4367e-18	2.12888e-10	chr5	68616052
AX-177243792	11	29883529	A	G	680	0.35±0.04	77.0116	1.69955e-18	2.32611e-10	chr5	72368032
AX-177240424	11	26546831	G	T	681	0.24±0.027	76.6595	2.03125e-18	2.55543e-10	chr5	69061926
AX-177130814	11	19856744	G	A	680	-0.23±0.026	76.6581	2.0327e-18	2.55639e-10	chr5	62484301
AX-177144021	11	17314942	G	A	680	0.2±0.023	76.3074	2.42773e-18	2.80739e-10	chr5	59954461
AX-177278603	11	17242363	G	A	680	0.2±0.023	76.1613	2.61413e-18	2.91909e-10	chr5	59882833
AX-176980932	11	17191184	G	A	680	0.2±0.023	76.1019	2.69398e-18	2.96578e-10	chr5	59831438
AX-177226550	11	29866593	G	A	681	0.34±0.039	75.938	2.92714e-18	3.09851e-10	chr5	72351204
AX-177191710	11	20849530	A	G	680	-0.24±0.028	75.6753	3.34368e-18	3.32375e-10	chr5	63455788
AX-177006214	11	20258693	A	G	681	-0.24±0.028	75.6503	3.38619e-18	3.34597e-10	chr5	62886507
AX-176892246	11	19796459	G	A	679	-0.23±0.026	75.5583	3.54782e-18	3.42928e-10	chr5	62423507
AX-176888428	11	17235602	G	A	681	0.2±0.023	75.3153	4.01231e-18	3.65922e-10	chr5	59876087
AX-176977714	11	17233396	A	G	681	0.2±0.023	75.3153	4.01231e-18	3.65922e-10	chr5	59873890
AX-176908777	11	10915652	T	C	681	0.28±0.032	75.2233	4.20373e-18	3.75028e-10	chr5	53635264
AX-177057699	11	25779456	C	T	681	0.27±0.032	74.5602	5.88185e-18	4.4773e-10	chr5	68296828
AX-177053351	11	19747156	G	A	681	-0.23±0.026	74.5426	5.93451e-18	4.4984e-10	chr5	62374969
AX-177076266	11	17420567	G	A	679	0.2±0.023	74.5419	5.93652e-18	4.4992e-10	chr5	60061384
AX-177367308	11	30554634	G	A	681	0.34±0.039	74.398	6.38533e-18	4.67556e-10	chr5	73039753
AX-176923797	11	17289531	G	A	680	0.2±0.023	73.8451	8.44954e-18	5.42015e-10	chr5	59928675
AX-177168962	11	19284242	C	T	678	-0.23±0.027	73.8328	8.5023e-18	5.43797e-10	chr5	61911389
AX-177135505	11	24251005	C	T	678	0.28±0.032	73.762	8.81264e-18	5.54181e-10	chr5	66794083
AX-177274362	11	24255909	C	T	680	0.28±0.032	73.2934	1.11738e-17	6.28125e-10	chr5	66799081
AX-176906176	11	29096805	T	C	680	0.32±0.037	73.2684	1.13163e-17	6.32337e-10	chr5	71581300
AX-177202078	11	19429942	C	T	681	0.21±0.024	73.1193	1.22048e-17	6.58065e-10	chr5	62063015
AX-178021833	11	20931355	A	G	681	0.21±0.025	73.1175	1.22155e-17	6.58369e-10	chr5	63537195
AX-177302467	11	17224960	T	C	681	0.19±0.022	73.0844	1.24225e-17	6.64231e-10	chr5	59865451
AX-177187074	11	18904953	T	C	680	0.19±0.023	72.9718	1.31516e-17	6.84527e-10	chr5	61532481
AX-178047682	11	19774211	A	G	681	-0.22±0.026	72.9378	1.33803e-17	6.9078e-10	chr5	62401465
AX-177041451	11	24254473	A	G	681	0.28±0.032	72.8863	1.37341e-17	7.00359e-10	chr5	66797640
AX-177099744	11	25654288	T	G	681	0.21±0.024	72.7938	1.43926e-17	7.17881e-10	chr5	68198218
AX-177323291	11	28941326	T	C	679	0.33±0.039	72.7068	1.50417e-17	7.34788e-10	chr5	71426477
AX-177193634	11	17265517	C	T	679	0.19±0.023	72.6357	1.55935e-17	7.4889e-10	chr5	59905336
AX-177045617	11	19212465	T	C	678	0.2±0.024	72.5794	1.60445e-17	7.60243e-10	chr5	61839808
AX-176998433	11	19709624	T	C	680	-0.23±0.027	72.4907	1.6782e-17	7.78487e-10	chr5	62336923
AX-178049279	11	19979972	A	C	681	-0.24±0.028	72.4667	1.69876e-17	7.83505e-10	chr5	62607410
AX-178049284	11	27530363	G	A	681	0.21±0.024	72.4099	1.74834e-17	7.95489e-10	chr5	70039147
AX-177212101	11	19826403	G	A	679	-0.22±0.026	72.3958	1.76087e-17	7.98493e-10	chr5	62453491
AX-177206360	11	28640220	C	T	678	0.33±0.039	72.2877	1.86004e-17	8.21916e-10	chr5	71124635
AX-177275019	11	29834526	C	T	681	0.33±0.039	72.1119	2.03336e-17	8.61482e-10	chr5	72319331
AX-177104477	11	25851944	T	C	676	-0.2±0.024	72.084	2.06234e-17	8.67939e-10	chr5	68368486
AX-177164884	11	21057075	C	A	679	-0.23±0.028	72.0792	2.06731e-17	8.69042e-10	chr5	63644700
AX-178035276	11	29711402	G	T	679	0.33±0.038	72.0536	2.09433e-17	8.75019e-10	chr5	72198076
AX-177151134	11	27843432	G	A	680	0.33±0.039	71.6628	2.55298e-17	9.71411e-10	chr5	70348185
AX-177178687	11	27791445	A	G	680	0.33±0.039	71.5	2.77263e-17	1.01466e-09	chr5	70296581
AX-176900926	1772	669	G	A	665	0.31±0.037	71.4286	2.87471e-17	1.03421e-09	chr5	76502509
AX-177235257	11	17203253	G	A	679	0.19±0.023	71.2531	3.14212e-17	1.08391e-09	chr5	59843535
AX-177224001	11	29846092	C	T	679	0.32±0.038	71.16	3.29401e-17	1.11126e-09	chr5	72330881
AX-177236951	11	27836117	C	A	681	0.33±0.039	71.1296	3.34513e-17	1.12033e-09	chr5	70340614
AX-178040446	11	27935870	C	T	681	0.33±0.039	71.1296	3.34513e-17	1.12033e-09	chr5	70442825
AX-177345840	11	21077157	T	C	681	0.21±0.025	71.0548	3.47446e-17	1.14298e-09	chr5	63664231
AX-177102476	11	21961264	C	T	680	-0.25±0.03	70.8681	3.81916e-17	1.2015e-09	chr5	64524981
AX-177295135	68	319528	G	A	681	0.3±0.036	70.823	3.90759e-17	1.2161e-09	chr5	76566415
AX-177063273	11	26860568	G	T	678	0.26±0.031	70.6791	4.20312e-17	1.26381e-09	chr5	69372533
AX-177189163	11	28320605	A	C	676	0.33±0.039	70.5875	4.40296e-17	1.29518e-09	chr5	70823327
AX-176971110	11	20653336	C	T	680	-0.23±0.027	70.394	4.85665e-17	1.36399e-09	chr5	63258645
AX-177185939	11	20638715	G	A	678	-0.23±0.028	70.2683	5.17627e-17	1.41066e-09	chr5	63243727
AX-177081249	11	27550057	T	C	681	0.28±0.034	70.1247	5.56706e-17	1.46591e-09	chr5	70057674
AX-176905920	11	27596289	T	C	680	0.33±0.039	70.1022	5.63095e-17	1.47477e-09	chr5	70103227
AX-177210229	11	28762110	C	T	679	0.32±0.039	69.7601	6.69737e-17	1.61617e-09	chr5	71247212
AX-177101433	11	18598707	T	C	681	0.21±0.025	69.6744	6.99484e-17	1.65368e-09	chr5	61228638
AX-176887806	11	21078654	G	A	680	0.21±0.025	69.6319	7.14704e-17	1.67257e-09	NA	NA
AX-176997821	11	28479740	A	G	678	0.32±0.039	69.6305	7.15231e-17	1.67323e-09	chr5	70983019
AX-177203363	11	18373509	T	C	679	0.2±0.025	69.5678	7.38336e-17	1.70155e-09	chr5	61004735
AX-177015146	11	19005083	A	G	681	0.18±0.022	69.5493	7.45274e-17	1.70997e-09	chr5	61634108
AX-177250884	11	20288206	C	T	681	-0.23±0.027	69.4311	7.91303e-17	1.76493e-09	chr5	62915982
AX-177217535	11	20622711	T	C	681	-0.23±0.027	69.3924	8.06978e-17	1.7833e-09	chr5	63227627
AX-177292564	11	16826772	G	A	681	0.23±0.027	69.3793	8.12376e-17	1.78959e-09	chr5	59462632
AX-177323246	11	28330886	G	A	672	0.32±0.038	69.3518	8.23757e-17	1.80279e-09	chr5	70833610
AX-177241560	11	29997394	C	T	681	0.32±0.039	69.2664	8.60211e-17	1.84447e-09	chr5	72481343
AX-177256758	11	30002812	C	A	681	0.32±0.039	69.2664	8.60211e-17	1.84447e-09	chr5	72486755
AX-176970339	11	28332744	G	A	681	0.32±0.039	69.0943	9.38659e-17	1.93145e-09	chr5	70835448
AX-176982530	11	28632028	C	A	681	0.32±0.039	69.0943	9.38659e-17	1.93145e-09	chr5	71116457
AX-177015186	11	28180307	C	T	681	0.32±0.039	69.0943	9.38659e-17	1.93145e-09	chr5	70684046
AX-177075071	11	28757677	C	A	681	0.32±0.039	69.0943	9.38659e-17	1.93145e-09	chr5	71242738
AX-177154472	11	28531838	C	T	681	0.32±0.039	69.0943	9.38659e-17	1.93145e-09	chr5	71031864
AX-177192222	11	28740766	C	T	681	0.32±0.039	69.0943	9.38659e-17	1.93145e-09	chr5	71225826
AX-177244449	11	28611259	C	T	681	0.32±0.039	69.0943	9.38659e-17	1.93145e-09	chr5	71095516
AX-177255738	11	28822728	G	A	681	0.32±0.039	69.0943	9.38659e-17	1.93145e-09	chr5	71305380
AX-177286135	11	28883282	T	C	681	0.32±0.039	69.0943	9.38659e-17	1.93145e-09	chr5	71366184
AX-177289148	11	28035145	T	C	681	0.32±0.039	69.0943	9.38659e-17	1.93145e-09	chr5	70541898
AX-177291060	11	28180741	G	A	681	0.32±0.039	69.0943	9.38659e-17	1.93145e-09	chr5	70684470
AX-177336178	11	28050453	G	A	681	0.32±0.039	69.0943	9.38659e-17	1.93145e-09	chr5	70556164
AX-177352472	11	28457060	G	A	681	0.32±0.039	69.0943	9.38659e-17	1.93145e-09	chr5	70960410
AX-178029994	11	28399132	G	A	681	0.32±0.039	69.0943	9.38659e-17	1.93145e-09	chr5	70900720
AX-177172196	11	20618506	G	A	680	-0.23±0.028	69.0803	9.45365e-17	1.93872e-09	chr5	63223194
AX-178030948	11	20979340	A	G	680	-0.23±0.027	68.857	1.05868e-16	2.05813e-09	chr5	63567613
AX-177117594	11	28023459	G	A	680	0.32±0.039	68.8405	1.0676e-16	2.06727e-09	chr5	70530211
AX-177167544	11	26463666	A	C	681	0.26±0.031	68.8327	1.0718e-16	2.07156e-09	chr5	68979105
AX-177072386	11	20633017	A	G	680	-0.21±0.025	68.8232	1.07698e-16	2.07684e-09	chr5	63238048
AX-177124609	11	29110296	A	G	681	0.31±0.038	68.4405	1.30767e-16	2.30095e-09	chr5	71594836
AX-177182026	11	29131193	C	T	681	0.31±0.038	68.4405	1.30767e-16	2.30095e-09	chr5	71619279
AX-177005896	11	28180638	A	G	680	0.32±0.039	68.4191	1.32193e-16	2.31417e-09	chr5	70684367
AX-177199992	11	22167435	A	G	681	-0.25±0.03	68.4	1.33478e-16	2.32602e-09	chr5	64731216
AX-177089308	11	28798628	T	C	680	0.32±0.038	68.3814	1.3474e-16	2.33761e-09	chr5	71281306
AX-177110207	11	29128189	G	A	679	0.31±0.037	68.336	1.37884e-16	2.36625e-09	chr5	71616061
AX-178034137	11	25948015	C	T	680	0.28±0.034	68.2398	1.44773e-16	2.42796e-09	chr5	68462554
AX-176966630	11	29265061	C	T	681	0.32±0.038	68.2035	1.47464e-16	2.45168e-09	chr5	71751997
AX-177203487	11	29266524	T	C	681	0.32±0.038	68.2035	1.47464e-16	2.45168e-09	chr5	71753472
AX-177205006	11	29250245	G	A	681	0.32±0.038	68.2035	1.47464e-16	2.45168e-09	chr5	71736978
AX-177207081	11	29266327	C	T	681	0.32±0.038	68.2035	1.47464e-16	2.45168e-09	chr5	71753267
AX-177366793	11	28502400	T	C	680	0.32±0.039	67.7099	1.89415e-16	2.7982e-09	chr5	71004215
AX-177184988	11	24728704	C	T	679	0.2±0.024	67.3435	2.28094e-16	3.08671e-09	chr5	67275298
AX-177017208	11	29972016	C	T	673	0.31±0.038	67.2409	2.40276e-16	3.1727e-09	chr5	72455807
AX-177015203	11	22023901	C	T	678	0.19±0.024	67.1803	2.47774e-16	3.22461e-09	chr5	64588100
AX-177342471	11	18554901	G	A	678	0.2±0.025	67.1409	2.52781e-16	3.25886e-09	chr5	61184816
AX-177293578	11	25549380	A	G	674	-0.19±0.023	67.1322	2.53891e-16	3.26642e-09	chr5	68093854
AX-177215298	11	20650739	C	T	679	-0.22±0.027	67.1305	2.54119e-16	3.26796e-09	chr5	63256028
AX-177324638	11	29243399	T	C	681	0.23±0.028	67.0764	2.61181e-16	3.31561e-09	chr5	71730061
AX-176887803	11	30322069	G	T	681	0.3±0.037	67.0273	2.67776e-16	3.35957e-09	chr5	72807452
AX-177009015	11	26087422	G	T	679	0.28±0.035	66.8935	2.86573e-16	3.48213e-09	chr5	68601206
AX-176958872	1772	935	G	A	678	0.3±0.037	66.5478	3.41518e-16	3.82014e-09	chr5	76502226
AX-176965678	11	22204218	T	C	680	-0.25±0.03	66.5171	3.46877e-16	3.85169e-09	chr5	64767464
AX-177181102	11	29256551	A	G	670	0.31±0.038	66.3403	3.79426e-16	4.03855e-09	chr5	71743509
AX-176928316	11	29251974	T	C	679	0.31±0.038	66.0722	4.34704e-16	4.33935e-09	chr5	71738728
AX-177043097	11	28011815	G	A	681	0.31±0.038	66.0657	4.36132e-16	4.34687e-09	chr5	70518582
AX-176943580	11	19336055	G	A	681	0.19±0.023	65.7721	5.06199e-16	4.70279e-09	chr5	61964445
AX-177345713	11	26396870	T	C	681	0.23±0.028	65.6152	5.48135e-16	4.90473e-09	chr5	68912968
AX-177018044	11	18849882	A	G	681	0.17±0.021	65.4694	5.90245e-16	5.10031e-09	chr5	61476959
AX-177022990	11	19348146	A	G	678	0.2±0.024	65.3855	6.15912e-16	5.2163e-09	chr5	61976733
AX-177384104	1772	580	T	C	678	0.29±0.036	65.043	7.3281e-16	5.71788e-09	chr5	76502597
AX-176943720	11	10106019	T	G	681	0.31±0.038	65.0035	7.47636e-16	5.77871e-09	chr5	52849505
AX-177086533	11	10033678	C	A	681	0.31±0.038	65.0035	7.47636e-16	5.77871e-09	chr5	52778554
AX-177289160	11	10038799	A	G	681	0.31±0.038	65.0035	7.47636e-16	5.77871e-09	chr5	52783973
AX-177326560	11	10021607	G	A	681	0.31±0.038	65.0035	7.47636e-16	5.77871e-09	chr5	52766502
AX-176978750	68	236168	C	T	681	0.29±0.036	64.9698	7.60562e-16	5.83128e-09	chr5	76485977
AX-177292607	11	27481560	T	C	680	0.3±0.037	64.8729	7.98878e-16	5.98469e-09	chr5	69990741
AX-176972678	11	19434980	T	C	679	0.19±0.023	64.8236	8.19138e-16	6.0644e-09	chr5	62067696
AX-176908234	11	19479527	G	A	678	-0.21±0.027	64.7509	8.49889e-16	6.18364e-09	chr5	62112249
AX-178041816	11	16789742	T	C	681	0.22±0.027	64.7022	8.71197e-16	6.26508e-09	chr5	59428234
AX-177172668	11	22423740	G	A	681	0.19±0.023	64.5651	9.33967e-16	6.49966e-09	chr5	64988911
AX-177073204	11	27550539	T	C	681	0.27±0.034	64.4932	9.68683e-16	6.62621e-09	chr5	70058162
AX-177236054	11	19483336	C	T	680	-0.21±0.027	64.4322	9.99124e-16	6.73543e-09	chr5	62116042
AX-177108468	68	249108	G	A	677	0.29±0.036	64.4269	1.00183e-15	6.74507e-09	chr5	76498549
AX-176976969	11	27959918	C	T	677	0.3±0.038	64.189	1.13036e-15	7.18929e-09	chr5	70466834
AX-177242427	11	19420086	C	T	680	-0.21±0.027	64.1196	1.17094e-15	7.32452e-09	chr5	62052658
AX-177113716	11	30113239	G	T	680	0.28±0.035	63.6865	1.4588e-15	8.22668e-09	chr5	72596974
AX-176896965	11	19284945	G	A	681	-0.21±0.027	63.6296	1.50152e-15	8.35312e-09	chr5	61912087
AX-176937873	11	19408387	G	A	681	-0.21±0.027	63.6296	1.50152e-15	8.35312e-09	chr5	62041024
AX-176983854	11	19311068	C	T	681	-0.21±0.027	63.6296	1.50152e-15	8.35312e-09	chr5	61939021
AX-176990475	11	19590354	G	T	681	-0.21±0.027	63.6296	1.50152e-15	8.35312e-09	chr5	62215002
AX-176995568	11	19591203	G	A	681	-0.21±0.027	63.6296	1.50152e-15	8.35312e-09	chr5	62215851
AX-177046737	11	19285040	G	A	681	-0.21±0.027	63.6296	1.50152e-15	8.35312e-09	chr5	61912182
AX-177075890	11	19420008	C	T	681	-0.21±0.027	63.6296	1.50152e-15	8.35312e-09	chr5	62052580
AX-177125416	11	19357581	A	G	681	-0.21±0.027	63.6296	1.50152e-15	8.35312e-09	chr5	61989739
AX-177224376	11	19341158	T	C	681	-0.21±0.027	63.6296	1.50152e-15	8.35312e-09	chr5	61969357
AX-177290535	11	19299799	A	G	681	-0.21±0.027	63.6296	1.50152e-15	8.35312e-09	chr5	61927492
AX-176965595	11	17190242	G	A	680	0.18±0.022	63.5451	1.56734e-15	8.54466e-09	chr5	59830496
AX-177007706	68	247784	C	T	680	0.29±0.037	63.3092	1.7668e-15	9.10306e-09	chr5	76497197
AX-177019543	11	19466170	A	C	677	-0.21±0.027	63.2119	1.85626e-15	9.34384e-09	chr5	62098915
AX-177142048	11	26675984	T	C	680	0.3±0.038	63.1554	1.91023e-15	9.48642e-09	chr5	69189426
AX-177017845	68	268457	G	A	681	0.29±0.037	63.0609	2.00409e-15	9.72999e-09	chr5	76517579
AX-177078149	68	198004	A	G	681	0.29±0.037	63.0609	2.00409e-15	9.72999e-09	chr5	76448339
AX-177228333	68	222718	A	G	681	0.29±0.037	63.0609	2.00409e-15	9.72999e-09	chr5	76473226
AX-177233247	68	250864	A	G	681	0.29±0.037	63.0609	2.00409e-15	9.72999e-09	chr5	76500272
AX-177289395	68	267408	T	G	681	0.29±0.037	63.0609	2.00409e-15	9.72999e-09	chr5	76516534
AX-177311570	68	250978	T	C	681	0.29±0.037	63.0609	2.00409e-15	9.72999e-09	chr5	76500388
AX-177212950	11	19382883	T	C	679	-0.21±0.027	62.824	2.26032e-15	1.03688e-08	chr5	62015128
AX-177287561	11	30106568	C	T	681	0.28±0.035	62.788	2.30203e-15	1.04695e-08	chr5	72590361
AX-177222649	11	19444339	A	G	677	-0.21±0.027	62.5583	2.5867e-15	1.1135e-08	chr5	62076939
AX-177315165	11	26666807	C	T	681	0.22±0.027	62.4726	2.70176e-15	1.13941e-08	chr5	69180113
AX-177055026	11	17472044	G	T	681	0.17±0.022	61.8683	3.67205e-15	1.34005e-08	chr5	60113422
AX-177025011	68	287078	G	A	677	0.25±0.032	61.8568	3.69363e-15	1.34421e-08	chr5	76537030
AX-177010267	11	18582387	C	T	681	0.21±0.026	61.5923	4.22466e-15	1.44314e-08	chr5	61212286
AX-177292941	11	18582549	C	T	681	0.21±0.026	61.5923	4.22466e-15	1.44314e-08	chr5	61212448
AX-177013371	11	19426363	T	G	679	-0.21±0.026	61.5378	4.34327e-15	1.46442e-08	NA	NA
AX-177143719	11	20907326	T	C	680	-0.19±0.024	61.3499	4.77821e-15	1.5402e-08	chr5	63514231
AX-176935067	11	18331444	G	A	677	0.21±0.027	61.2583	5.00574e-15	1.57855e-08	chr5	60964883
AX-176921696	11	22368203	T	C	681	0.2±0.026	61.2327	5.07132e-15	1.58945e-08	chr5	64931476
AX-177154824	11	25848697	A	C	681	-0.19±0.025	61.214	5.11973e-15	1.59745e-08	chr5	68365265
AX-177311083	11	19262077	T	G	681	-0.21±0.027	61.0918	5.44756e-15	1.65074e-08	chr5	61889756
AX-177289413	68	275004	G	A	681	0.28±0.036	61.0309	5.6187e-15	1.67796e-08	chr5	76524041
AX-177042169	11	18770374	C	T	679	0.2±0.026	61.0296	5.62226e-15	1.67853e-08	chr5	61398553
AX-177053289	11	26850019	C	T	681	0.25±0.032	60.8067	6.29646e-15	1.78211e-08	chr5	69361927
AX-176996128	11	32279770	T	C	680	0.27±0.035	60.4073	7.71266e-15	1.98391e-08	chr5	74703059
AX-176941088	11	17245781	C	T	680	0.17±0.022	60.306	8.11993e-15	2.03863e-08	chr5	59886001
AX-176927743	11	26356504	T	C	680	0.24±0.031	60.2307	8.4366e-15	2.0803e-08	chr5	68872774
AX-177292675	11	19228794	A	G	678	-0.19±0.024	60.1355	8.85485e-15	2.13421e-08	chr5	61856532
AX-176951640	11	32279720	T	C	681	0.27±0.035	60.0791	9.11203e-15	2.16677e-08	chr5	74703001
AX-177128275	11	32280219	A	G	681	0.27±0.035	60.0791	9.11203e-15	2.16677e-08	chr5	74703505
AX-178037733	11	29391635	C	A	681	0.29±0.037	59.8715	1.01255e-14	2.29105e-08	chr5	71878502
AX-177217745	11	22186601	C	T	665	-0.18±0.023	59.8064	1.0466e-14	2.33148e-08	chr5	64750312
AX-176927160	68	346272	A	G	678	0.28±0.036	59.8026	1.04864e-14	2.33387e-08	chr5	76592866
AX-177036662	11	19276165	T	C	679	-0.19±0.025	59.6357	1.14145e-14	2.44093e-08	chr5	61903125
AX-178043211	11	25898681	C	T	680	-0.18±0.024	59.5416	1.19739e-14	2.50348e-08	chr5	68414664
AX-177108242	11	30897616	G	A	681	0.29±0.038	58.7667	1.77521e-14	3.08318e-08	chr5	73377033
AX-177321733	11	19364954	C	T	679	-0.2±0.027	58.669	1.86561e-14	3.16525e-08	chr5	61997562
AX-177145810	11	18897999	G	A	681	0.17±0.023	58.554	1.97783e-14	3.26458e-08	chr5	61525563
AX-177077825	11	30378968	G	A	681	0.26±0.034	58.4645	2.06992e-14	3.34413e-08	chr5	72863814
AX-177124922	11	32303225	T	C	674	0.26±0.034	58.3865	2.15367e-14	3.41504e-08	chr5	74725557
AX-177277823	11	18824711	T	C	681	0.19±0.025	57.8865	2.77683e-14	3.90648e-08	chr5	61452614
AX-177279240	11	10215988	T	C	681	0.28±0.036	57.6257	3.17052e-14	4.19036e-08	chr5	52958729
AX-177078952	11	27628611	A	G	680	0.19±0.025	57.5714	3.25933e-14	4.25205e-08	chr5	70135220
AX-177018286	11	29099628	T	G	680	0.27±0.035	57.5325	3.32448e-14	4.29682e-08	chr5	71584114
AX-177229029	11	18371763	T	G	681	0.21±0.027	57.4024	3.55174e-14	4.44981e-08	chr5	61002986
AX-176975150	11	30952847	G	A	680	0.28±0.037	57.3663	3.61753e-14	4.49324e-08	chr5	73432392
AX-177007565	11	19474498	C	T	665	-0.2±0.026	56.9795	4.4038e-14	4.98605e-08	chr5	62107001
AX-177368165	11	27376053	A	G	681	0.21±0.028	56.4984	5.6243e-14	5.67518e-08	chr5	69884335
AX-176940684	11	9949799	G	A	681	0.27±0.035	56.4567	5.74509e-14	5.73937e-08	chr5	52695843
AX-177239433	11	10219435	C	A	680	0.27±0.036	56.3775	5.981e-14	5.86291e-08	chr5	52962206
AX-177252717	11	26178160	T	G	680	0.2±0.026	56.288	6.25953e-14	6.00586e-08	chr5	68692748
AX-176920040	11	26635653	T	C	681	0.28±0.037	56.281	6.28204e-14	6.01728e-08	chr5	69149038
AX-177343063	11	10199641	A	G	677	0.27±0.036	56.2036	6.53423e-14	6.14395e-08	chr5	52942562
AX-177124572	11	10056605	C	T	680	0.28±0.038	56.13	6.78334e-14	6.26683e-08	chr5	52801781
AX-177345287	11	22209686	T	C	681	-0.22±0.029	56.026	7.15177e-14	6.44474e-08	chr5	64772494
AX-177221725	11	24562217	A	C	679	0.22±0.029	55.9934	7.2714e-14	6.50158e-08	chr5	67107744
AX-177207151	11	26138655	A	G	676	0.26±0.035	55.6887	8.49059e-14	7.05752e-08	chr5	68652847
AX-178036505	11	16252569	T	C	681	0.2±0.026	55.6142	8.81828e-14	7.20041e-08	chr5	58896721
AX-176959119	11	26509013	A	G	680	0.21±0.028	55.3593	1.00395e-13	7.71215e-08	chr5	69024356
AX-176891140	11	30378457	A	G	681	0.25±0.034	55.2958	1.03688e-13	7.84505e-08	chr5	72863302
AX-176932968	11	20524425	G	A	679	0.18±0.024	55.2196	1.07789e-13	8.00781e-08	NA	NA
AX-177292370	11	28575770	G	A	679	0.27±0.037	55.0739	1.16084e-13	8.32835e-08	chr5	71061394
AX-177307575	11	17149328	C	T	681	0.17±0.022	54.9857	1.21408e-13	8.52843e-08	chr5	59789275
AX-177045905	11	18928910	T	G	679	0.22±0.029	54.8131	1.32554e-13	8.93439e-08	chr5	61557136
AX-177196353	11	19828251	C	T	681	-0.18±0.024	54.2905	1.72932e-13	1.02851e-07	chr5	62455340
AX-177129105	11	30432916	T	C	681	0.24±0.033	54.2117	1.80016e-13	1.05061e-07	chr5	72917880
AX-177185293	11	30727985	G	A	680	0.27±0.036	54.1072	1.89844e-13	1.0806e-07	chr5	73212075
AX-177005492	11	20986487	A	G	680	-0.19±0.025	54.1013	1.90418e-13	1.08233e-07	chr5	63575159
AX-177286227	11	29307128	T	C	680	0.2±0.027	53.8009	2.21873e-13	1.1736e-07	chr5	71793886
AX-177016863	11	22146551	A	G	681	-0.18±0.024	53.7465	2.28102e-13	1.19094e-07	chr5	64713846
AX-177334093	11	26161535	A	G	680	0.26±0.035	53.4828	2.60862e-13	1.27866e-07	chr5	68676017
AX-177219315	11	19573101	G	A	664	-0.19±0.027	53.4348	2.67326e-13	1.29534e-07	chr5	62197103
AX-177131533	11	19345365	A	G	680	0.17±0.023	53.3593	2.77791e-13	1.32196e-07	chr5	61973614
AX-177141240	11	30448050	T	C	679	0.24±0.033	53.2692	2.90829e-13	1.35447e-07	chr5	72932988
AX-177094897	11	18108196	T	C	679	0.15±0.021	53.2024	3.00884e-13	1.37907e-07	chr5	60743448
AX-177294566	11	25837297	G	A	680	0.17±0.024	53.1965	3.01803e-13	1.3813e-07	chr5	68353954
